# Supplementary material
Source: publisher site journal article supplement (https://www.spandidos-publications.com/5010/downloadSupplementary)

Figure S1. CXCR4 is expressed in the adult cardiomyocytes. Immunohistochemical staining of CXCR4 (brown) in the ventricular myocardium of adult mice.

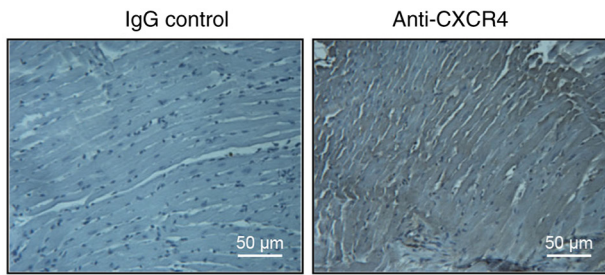

Figure S2. Cardiomyocyte <sup>CM</sup>KO mice display an increased heart rate during light anesthesia. Heart rates (beats per min) were recorded in 2-month-old male mice under light anesthesia normally used during Echocardiography. (A) ECG recording during Echocardiography. (B) Quantification of heart rates. \*P<0.05. n=15 per group. <sup>CM</sup>KO, CXCR4 knockout.

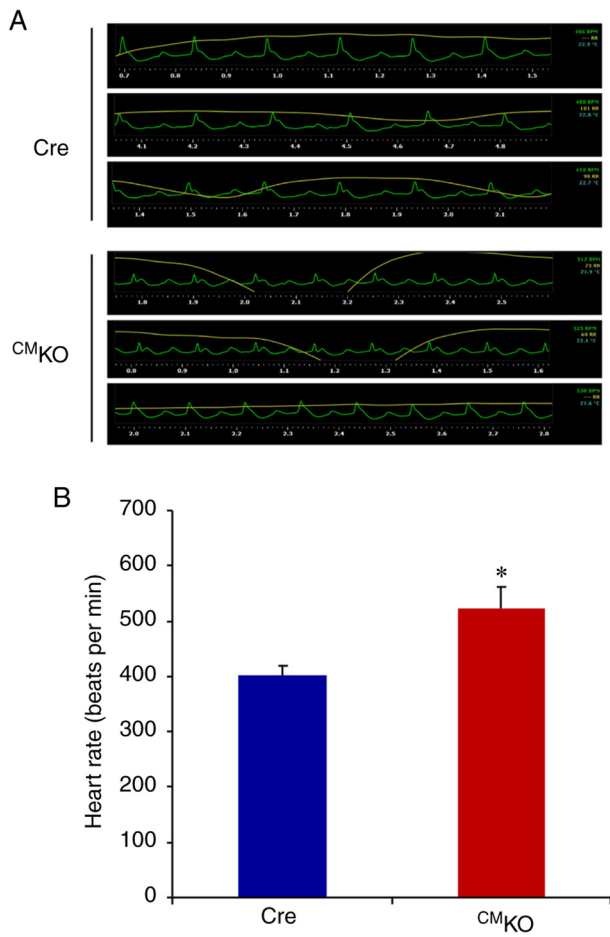

Supplement: Supplementary file 1 [file downloadSupplementary]
